# Supplementary material
Source: ML conference proceedings conference paper supplement (https://openreview.net/forum?id=aDoUEhZ0ap)
Supplement: supplementary_material [file attachment]

---

# Sageflow: Robust Federated Learning against Both Stragglers and Adversaries (Supplementary Material)

---

Anonymous Author(s)

Affiliation

Address

email

## 1 A Hyperparameter setting

2 All experiments were performed in PyTorch on an Intel Xeon CPU E5-2620 v4 @ 2.10GHz and a  
3 Geforce GTX 1080 Ti.

### 4 A.1 Scenario with only stragglers

5 The hyperparameter settings for Sageflow are shown in Table 1. For the schemes *ignore stragglers*  
6 and *wait for stragglers* combined with FedAvg, we decayed the learning rate during training. For the  
7 FedAsync scheme of [7], we take a polynomial strategy with hyperparameters  $a = 0.5$ ,  $\alpha = 0.8$ , and  
8 decayed  $\gamma$  during training.

Table 1: Hyperparameters for Sageflow with only stragglers

| Dataset | $\gamma$ | staleness exponent $\lambda$ | loss exponent $\delta$ | entropy threshold $E_{th}$ | Learning rate | $\gamma$ decay          |
|---------|----------|------------------------------|------------------------|----------------------------|---------------|-------------------------|
| MNIST   | 0.5      | 0.5                          | 1                      | 1                          | 0.01          | Every 15 global epochs  |
| FMNIST  | 0.5      | 0.5                          | 1                      | 1                          | 0.01          | Every 20 global epochs  |
| CIFAR10 | 0.5      | 1.5                          | 1                      | 1                          | 0.01          | Every 300 global epochs |

### 9 A.2 Scenario with only adversaries

10 **Data poisoning and model poisoning attacks:** Table 2 describes the hyperparameters for Sageflow  
11 with only adversaries, under data poisoning and model poisoning attacks. For RFA of [5], the  
12 maximum iteration is set to 10. In this setup, the learning rate is decayed for all three schemes  
13 (Sageflow, RFA, FedAvg).

Table 2: Hyperparameters for Sageflow with only adversaries, under data and model poisoning

| Dataset | $\gamma$ | $\lambda$ | $\delta$ | $E_{th}$ | Learning rate | $\gamma$ decay |
|---------|----------|-----------|----------|----------|---------------|----------------|
| MNIST   | 1        | -         | 1        | 1        | 0.01          | No decay       |
| FMNIST  | 1        | -         | 1        | 1        | 0.01          | No decay       |
| CIFAR10 | 1        | -         | 1        | 1        | 0.01          | No decay       |

14 **Backdoor attack:** In this backdoor attack scenario, we utilized the Dirichlet distribution with  
15 parameter 0.5 for distributing training samples to  $N = 100$  devices. The local batch size is set to  
16 64 and the number of poisoned images is 20. The hyperparameter details for Sageflow are shown in  
17 Table 3.

Table 3: Hyperparameters for Sageflow with only adversaries, under backdoor attack

| Dataset | $\gamma$ | $\lambda$ | $\delta$ | $E_{th}$ | Learning rate | $\gamma$ decay |
|---------|----------|-----------|----------|----------|---------------|----------------|
| MNIST   | 1        | -         | 5        | 2        | 0.01          | No decay       |
| FMNIST  | 1        | -         | 5        | 2        | 0.01          | No decay       |
| CIFAR10 | 1        | -         | 5        | 2        | 0.01          | No decay       |

18 **A.3 Scenario with both stragglers and adversaries**

19 **Data poisoning and model poisoning attacks:** The hyperparameters for Sageflow are shown in  
 20 Table 2.

21 **Backdoor attack:** The hyperparameter details are shown in Table 4.

Table 4: Hyperparameters for Sageflow with both stragglers and adversaries, under backdoor attack

| Dataset | $\gamma$ | $\lambda$ | $\delta$ | $E_{th}$ | Learning rate | $\gamma$ decay           |
|---------|----------|-----------|----------|----------|---------------|--------------------------|
| MNIST   | 0.5      | 0.5       | 5        | 2        | 0.01          | No decay                 |
| FMNIST  | 0.5      | 0.5       | 5        | 2        | 0.01          | No decay                 |
| CIFAR10 | 0.5      | 1.5       | 5        | 2        | 0.01          | Every 1000 global epochs |

22 **A.4 Setup for Tables 1 and 2 in the main manuscript**

23 In Tables 1 and 2 of the main manuscript, we evaluated test accuracies at specific global rounds or  
 24 time. We specify these values in Table 5.

Table 5: Global round or time for evaluating accuracy in Tables 1 and 2 of the main manuscript.

| Setup \ Datasets                   | Model poisoning |        |         | Data poisoning |        |         | Scaled backdoor attack |        |         |
|------------------------------------|-----------------|--------|---------|----------------|--------|---------|------------------------|--------|---------|
|                                    | MNIST           | FMNIST | CIFAR10 | MNIST          | FMNIST | CIFAR10 | MNIST                  | FMNIST | CIFAR10 |
| Only adversaries (global round)    | 40              | 70     | 800     | 40             | 70     | 800     | 180                    | 100    | 1600    |
| Both stragglers/adversaries (time) | 40              | 70     | 828     | 70             | 70     | 800     | 50                     | 50     | 1200    |

25 **B Additional experiments under backdoor attack**

26 **B.1 Experimental setup with backdoor attack**

27 We embedded 12 white pixels in the top-left corner of the image and the labels of these poisoned  
 28 images are set to 2. We utilize the Dirichlet distribution with parameter 0.5 for distributing training  
 29 samples to  $N = 100$  devices. We set  $C$ , the fraction of  $N = 100$  devices participating in each global  
 30 round, to 0.1 and  $r$ , the portion of adversarial devices, also to 0.1 at each global round. The local  
 31 batch size is set to 64. The number of poisoned images in a batch is 20, and we do not decay the  
 32 learning rate here.

33 **B.2 Experiments under no-scaled backdoor attack**

34 In addition to the *model replacement* backdoor attack (or scaled backdoor attack) we considered so  
 35 far, we perform additional experiments under the no-scaled backdoor attack [1] where the adversarial  
 36 devices do not scale the weights and only transmit corrupted models to the server. Fig. 1 shows  
 37 the performance under the no-scaled backdoor attack with only adversaries (no stragglers). Fig. 2  
 38 shows the case with both stragglers and adversaries. We set  $C = 0.1$  and  $r = 0.1$  for both figures.  
 39 Since the models corrupted by no-scaled backdoor attack do not significantly degrade the overall test  
 40 accuracy, it seems that Sageflow and other schemes are not able to completely defend against the  
 41 attack. However, Sageflow noticeably slows down the poisoning of the global model compared to  
 42 other methods.

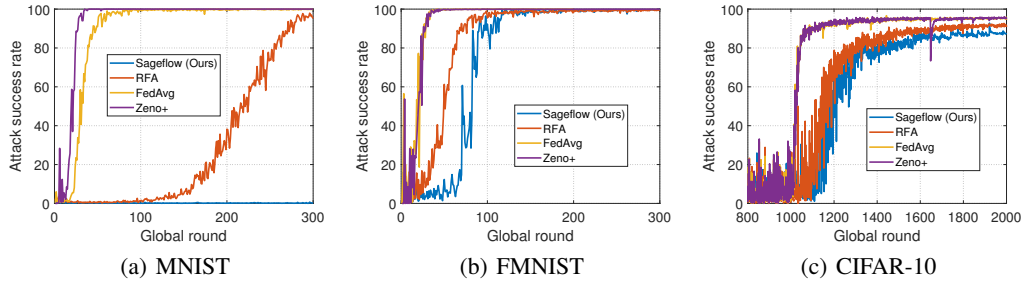

Figure 1: Performance comparison with only adversaries under no-scaled backdoor attack. Sageflow can slow down the poisoning of the global model compared to other methods.

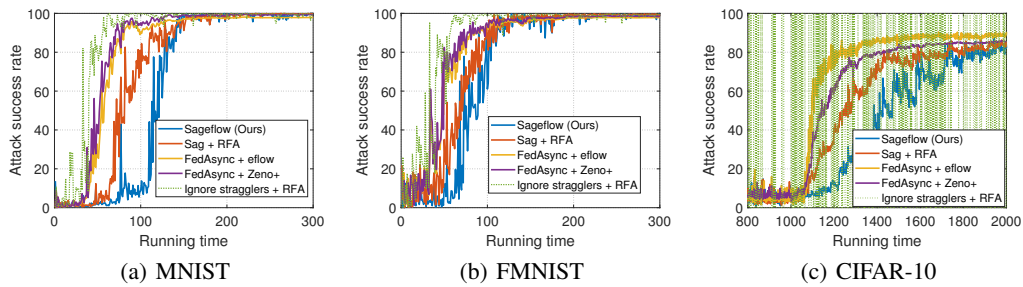

Figure 2: Performance with both stragglers and adversaries under no-scaled backdoor attack. Sageflow can slow down the poisoning of the global model compared to other methods.

### 43 C Experiments under model poisoning with scale 10

44 Some additional experiments were conducted under model poisoning with the scale factor 10. Fig. 3  
 45 shows the results with  $C = 0.2$  and with  $r = 0.2$ . When modeling stragglers, each device can have a  
 46 delay of 0, 1 or 2, which is determined independently and uniformly random. The loss associated  
 47 with a poisoned device increases if we increase the scale factor from 0.1 to 10. Hence, not only  
 48 Sageflow but also Zeno+ can effectively defend against the attacks with only adversaries. However,  
 49 under the existence of both stragglers/adversaries, Sageflow outperforms other baselines.

### 50 D Experimental results with varying hyperparameters

51 To observe the impact of hyperparameter setting, we performed additional experiments with various  
 52  $\delta$  and  $E_{th}$  values, the key hyperparameters of Sageflow. The results are shown in Fig. 4 with only  
 53 adversaries. We performed the data poisoning attack for varying  $\delta$  and the model poisoning attack  
 54 with scale 0.1 for varying  $E_{th}$ . We set  $C = 0.2$  and  $r = 0.2$ .

55 First, the results under data poisoning show that the performance of Sageflow is not sensitive to  $\delta$  if  
 56 they are chosen in the appropriate range of  $[1, 2]$ . For the model poisoning attack, if we use a very  
 57 small  $E_{th}$  like 0.3, the performance is poor because a large number of devices get filtered out. If we  
 58 use a large  $E_{th}$ , the performance is also very poor since the scheme cannot filter out the adversaries.  
 59 However, similar to the behavior of hyperparameter  $\delta$ , we can confirm that our scheme performs well  
 60 regardless of dataset if  $E_{th}$  is chosen in an appropriate range of  $[1, 2]$ .

61 To summarize, our scheme still performs well (better than RFA), even with coarsely chosen hyperpa-  
 62 rameter values regardless of the dataset.

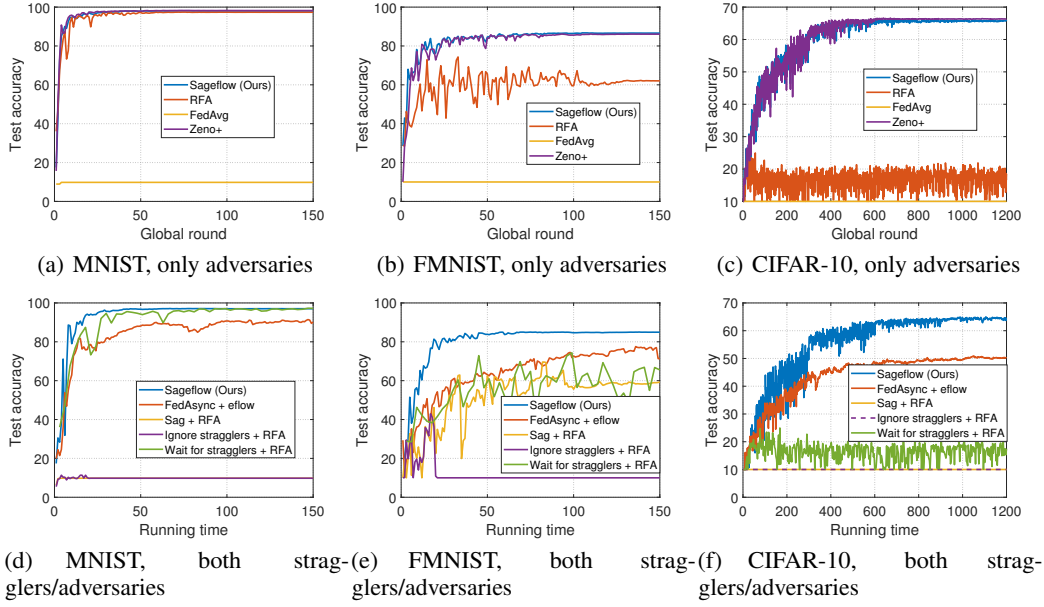

Figure 3: Performance under model poisoning with scale 10. Both Sageflow and Zeno+ perform well with only adversaries, while only Sageflow performs well under the existence of both stragglers/adversaries.

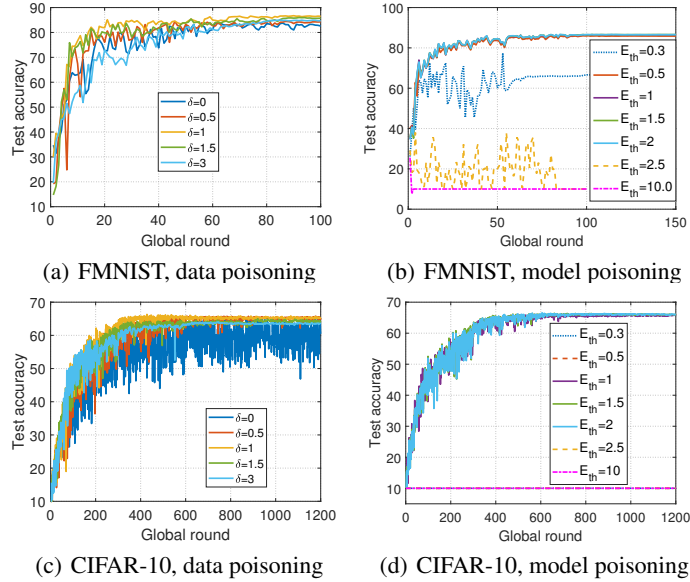

Figure 4: Impact of varying hyperparameter values under model poisoning and data poisoning attacks. The performance of Sageflow is not highly sensitive to the exact settings of loss exponent  $\delta$  and entropy threshold  $E_{th}$ , as long as they are chosen in a reasonable range.

## 63 E Comparison with other robust aggregation methods against adversaries

64 In this section, we compare our algorithm with various existing aggregation methods that are robust  
 65 against adversaries.

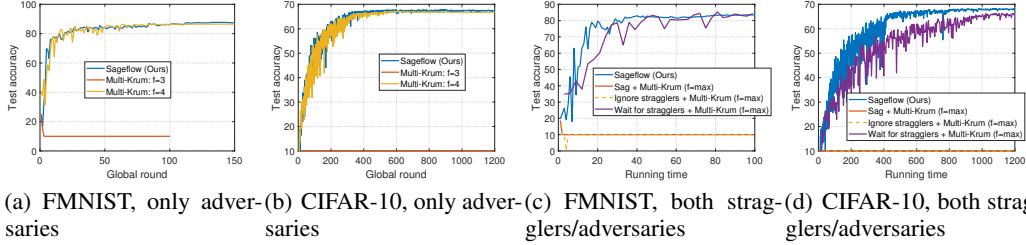

(a) FMNIST, only adversaries (b) CIFAR-10, only adversaries (c) FMNIST, both stragglers/adversaries (d) CIFAR-10, both stragglers/adversaries

Figure 5: Performance comparison with Multi-Krum under model poisoning. With only adversaries, Multi-Krum performs well when an appropriate  $f$  parameter value is chosen. However, the performance of Multi-Krum degrades significantly when stragglers exist (even when combined with straggler-mitigating schemes). This is because the attack ratio can become very high when combined with staleness-aware grouping or the ignoring stragglers scheme; the number of adversaries exceeds  $f$ , significantly degrading the performance of Multi-Krum. When Multi-Krum is combined with the wait for stragglers scheme, the performance is not degraded by adversaries but by waiting for slow devices.

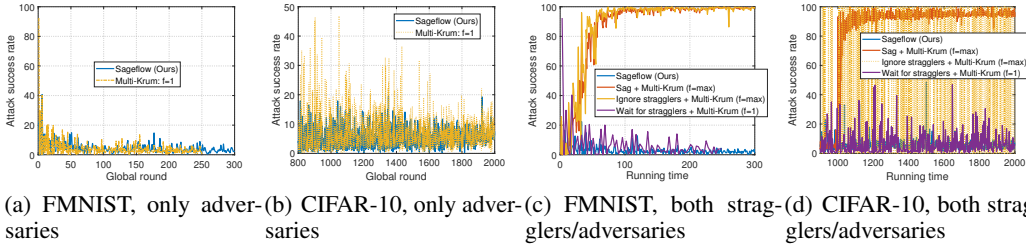

(a) FMNIST, only adversaries (b) CIFAR-10, only adversaries (c) FMNIST, both stragglers/adversaries (d) CIFAR-10, both stragglers/adversaries

Figure 6: Performance comparison with Multi-Krum under scaled backdoor attack. Multi-Krum performs well with only adversaries, but the performance is degraded when combined with straggler-mitigating schemes under the existence of both stragglers and adversaries.

## 66 E.1 Performance comparison with Multi-Krum

67 While we compared Sageflow with RFA in our main manuscript, here we compare our scheme with  
 68 *Multi-Krum* [2] which is a Byzantine-resilient aggregation method targeting conventional distributed  
 69 learning setup with IID data across nodes. In Multi-Krum, among  $N$  workers in the system, the server  
 70 tolerates  $f$  Byzantine workers under the assumption of  $2f + 2 < N$ . After filtering  $f$  worker nodes  
 71 based on squared-distances, the server chooses  $M$  workers among  $N - f$  remaining workers with the  
 72 best scores and aggregates them. We set  $M = N - f$  for comparing our scheme with Multi-Krum.

73 Fig. 5 compares Sageflow with Multi-Krum under model poisoning with scale 10. The stragglers  
 74 are modeled with delay 0, 1, 2. We first observe Figs. 5(a) and 5(b) which show the results with  
 75 only adversaries. It can be seen that if the number of adversaries exceed  $f$ , the performance of  
 76 Multi-Krum drops dramatically. Compared to Multi-Krum, the proposed Sageflow method can filter  
 77 out the poisoned devices and then take the weighted sum of the survived results even when the portion  
 78 of adversaries is high. Figs. 5(c) and 5(d) show the results under the existence of both stragglers  
 79 and adversaries, under the model poisoning attack. We let  $C = 0.2$  and  $r = 0.2$ , and the parameter  
 80  $f$  of Multi-Krum is set to the maximum value satisfying  $2f + 2 < N$ , where  $N$  depends on the  
 81 number of received results for both staleness-aware grouping (Sag) and *ignore stragglers* approaches.  
 82 However, even when we set  $f$  to the maximum value, the number of adversaries can still exceed  $f$ ,  
 83 which degrades the performance of Multi-Krum combined with staleness-aware grouping (Sag) or  
 84 the *ignore stragglers* approach. Obviously, Multi-Krum can be combined with the *wait for stragglers*  
 85 strategy by setting  $f$  large enough. However, this scheme still suffers from the effect of stragglers,  
 86 which significantly slows down the overall training process.

87 Fig. 6 compares Sageflow with Multi-Krum under scaled backdoor attack. The portion of participating  
 88 devices and the portion of adversaries at each global round are  $C = 0.1$  and  $r = 0.1$ , respectively.  
 89 The results are consistent with the results in Fig. 5, confirming the advantage of Sageflow over  
 90 Multi-Krum combined with straggler-mitigating schemes.

## 91 E.2 Performance comparison with FLTrust

92 We performed additional experiments by comparing our scheme with FLTrust proposed in [4] and  
93 OracleSGD in [6]. FLTrust utilizes public data at the server to update the server model and compute  
94 cosine similarities between each local model and the server model. By aggregating local models  
95 based on the cosine similarity score, FLTrust enables to reduce the impact of adversaries. OracleSGD  
96 can be viewed as an ideal performance as it assumes the full knowledge on which devices are the  
97 adversaries.

98 The setup is exactly the same in Fig. 5 of our main manuscript. We considered model poisoning  
99 attack with scale 0.1. To this end, we applied FLTrust and OracleSGD in each grouping stage of our  
100 staleness-aware aggregation. Since FLTrust also utilizes public data, we allocated the same public  
101 data for FLTrust as Sageflow. For OracleSGD, we performed FedAvg using the models of the benign  
102 devices. When public data is class-balanced (the number of samples are distributed uniformly across  
103 the classes in the public data), our scheme achieves the accuracy of 86.54% at running time 120 on  
104 FMNIST while 86.56%, 86.91% are achievable for FLTrust, OracleSGD, respectively. However,  
105 under the setting of Fig. 9 in Supplementary Material (when the public data is class-imbalanced),  
106 our scheme achieves accuracy of 85.6% at running time 120 on FMNIST while 81.5%, 86.91% are  
107 achievable for FLTrust, OracleSGD, respectively. Now using CIFAR10 with a class-balanced public  
108 data, our scheme and OracleSGD achieve 66.48% and 66.05% respectively, while FLTrust does  
109 not work well (achieving accuracy of 10%) on this relatively complicated dataset under our severe  
110 non-IIDness scenario. The overall results confirm the advantage of Sageflow in various practical  
111 settings.

## 112 E.3 Performance comparison with DiverseFL

113 We also performed additional experiments using DiverseFL proposed in [6]. In DiverseFL, the server  
114 utilizes each of the received “local dataset” to compute the gradient of each client. Then, the server  
115 computes the similarity between each of the computed gradient and the received gradient sent from  
116 the corresponding client, to filter out adversaries. We utilized DiverseFL in each grouping stage of  
117 our staleness-aware grouping to compare with our Sageflow. The setup is the same setup as in Fig.  
118 5 with both stragglers and adversaries. For a fair comparison, we let each client to send 2% of its  
119 local dataset to the server in DiverseFL. For MNIST, our scheme achieves accuracy of 97.71%, while  
120 DiverseFL achieves 97.58%. For FMNIST, the accuracies are 86.54% and 85.55% for our scheme  
121 and DiverseFL, respectively. Finally, 87.89% and 85.94% are achieved for our scheme and DiverseFL  
122 using FEMNIST dataset.

123 Here we note that DiverseFL requires several additional constraints to be utilized in practice compared  
124 to our Sageflow. First of all, in order for the server to compute the similarity between gradients, it is  
125 essential for the clients participating in FL to directly send their local data to the server. Secondly,  
126 the adversaries may upload the corrupted data to the server, which makes DiverseFL challenging to  
127 combat adversaries. Although the authors of this paper claim that the group of experts can remove  
128 this corrupted data at the server, this requires additional resources and efforts. Moreover, in order  
129 for the server to compute the gradient of the clients, DiverseFL requires the server to distinguish the  
130 local datasets of all clients. In other words, the server should remember which dataset come from  
131 which client, which can be challenging in cross-device FL scenarios having a significant number  
132 of clients in the system. Finally, at the server-side, DiverseFL needs to perform a large number of  
133 forward/backward propagations for computing the gradient (after multiple updates) of all clients in  
134 each global round, which causes additional computational burden at the server.

## 135 F Experimental results on the effect of loss-weighted averaging and 136 entropy-based filtering

137 In Fig. 7, we observe the effect of loss-weighted averaging and entropy-based filtering with only  
138 adversaries. For the model poisoning, we performed attack with scale 0.1. We also let  $C = 0.2$  and  
139  $r = 0.2$ . Both schemes work in a highly complementary fashion to tackle various attacks. Utilizing  
140 only one of these methods significantly degrades the model performance.

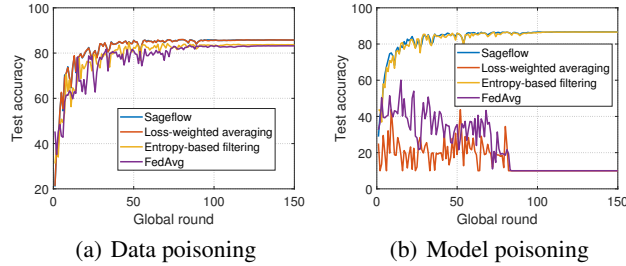

Figure 7: Effect of loss-weighted averaging and entropy-based filtering with only adversaries. FMNIST dataset used. Both schemes work in a highly complementary fashion to tackle various attacks. Utilizing only one of these methods significantly degrade the model performance.

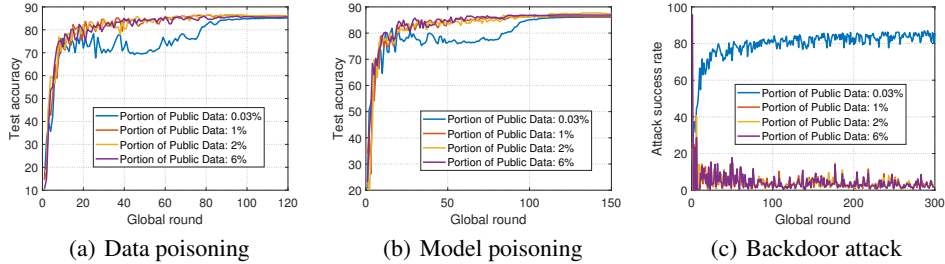

Figure 8: Impact of varying portions of public data at the server using FMNIST. We set  $C = 0.1$ ,  $r = 0.1$  for the backdoor attack and  $C = 0.2$ ,  $r = 0.2$  for other cases. Sageflow can defend against various attacks with only a small portion of public data (1%).

## 141 G Impact of public data

### 142 G.1 Varying amount of public data

143 Fig. 8 shows the results with various portions of public data on FMNIST. We set  $C = 0.1$ ,  $r = 0.1$   
 144 for the backdoor attack and  $C = 0.2$ ,  $r = 0.1$  for others. Note that in the main manuscript, we let 2%  
 145 of the entire training set to be the public data and then the remaining data to be the training data at  
 146 the devices for fair comparison with other schemes. In the setting of Fig. 8, the whole training set  
 147 is utilized at the devices for federated learning, and each device sends a certain portion of its local  
 148 data (for example, 2%) to the server to construct public dataset. It can be seen that our Sageflow  
 149 protects the system against adversarial attacks using only a very small amount of public data. When  
 150 the portion of the public data used gets as small as 0.03% of the entire training set, the robustness of  
 151 Sageflow does seem to suffer, but at 1% and higher, the performance is very robust across the board.

### 152 G.2 Imbalanced public data

153 In Fig. 9, we observe the performance of Sageflow with imbalanced public data; the number of data  
 154 samples are different across the classes in the public data. We utilize the Dirichlet distribution with  
 155 parameter 0.5 and 3 for distributing training samples to  $N = 100$  devices. We set  $C = 0.2$  and  
 156  $r = 0.2$ . We also let 2% of the entire training set to the public data. The overall results show that  
 157 Sageflow performs better than other schemes even with imbalanced public data at the server.

## 158 H Experiments on other datasets

### 159 H.1 Experiments on FEMNIST

160 We performed additional experiments using FEMNIST dataset [3] and obtained consistent results:  
 161 under the same setting of Fig. 5 in the main manuscript with both stragglers and adversaries (model  
 162 poisoning), our scheme achieves accuracy of 86.78% at running time 100 while 80.19%, 76.17%,  
 163 10%, 10% are achievable for FedAsync + eflow, Sag + RFA, ignore stragglers + RFA, wait for  
 164 stragglers + RFA, respectively. These results further confirm the advantage of our scheme compared  
 165 to various baselines.

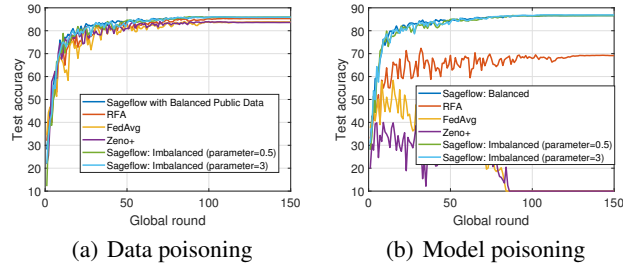

Figure 9: Impact of imbalanced public data at the server using FMNIST. We set  $C = 0.2$ ,  $r = 0.2$ . We let 2% of the entire dataset to be the public data. Sageflow performs better than other schemes even with an imbalanced public data.

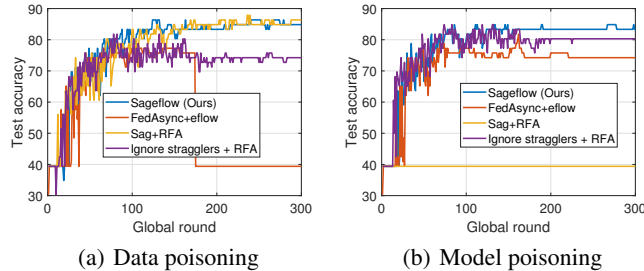

Figure 10: Performance of different schemes on a medical dataset (Covid-19 image dataset) under data and model poisoning attacks. Only Sageflow can handle both types of attacks in the presence of stragglers as well.

## 166 H.2 Experiments on Covid-19 dataset open to public

167 We performed additional experiments on Kaggle’s Covid-19 dataset<sup>1</sup>, which is *open to public*. Image  
 168 classification is performed to detect Covid-19 using Chest X-ray images. The dataset consists of  
 169 317 color images of  $3480 \times 4248$  pixels in 3 classes (Normal, Covid and Viral-Pneumonia). There  
 170 are a total of 251 training images and 66 test images. We took 15 image samples to construct the  
 171 server data, 5 samples for each class. Given only 251 training samples, this corresponds to a 6%  
 172 of the entire training set. We wanted to go to a lower portion, but 5 samples per class was as low  
 173 as one could reasonably go for estimating model entropies and losses at the server. We divided the  
 174 remaining training samples into 10 distributed devices, so each device got 23 or 24 image samples  
 175 over 3 classes. This setup simulates a realistic scenario, where a number of individual patients or  
 176 private clinics, each having some example X-ray images, wish to collaborate in developing a learner  
 177 that would classify new images. In the process, the server (e.g., at a central hospital or a service  
 178 provider) utilizes anonymous public X-ray image samples of the same disease categories to provide  
 179 protection against adversary attacks.

180 We set the participating device portion to  $C = 1$  and the adversary portion to  $r = 0.1$ . We assumed  
 181 both model poisoning and data poisoning attacks. For the model poisoning, we used scale 0.1. We  
 182 also allowed stragglers in the system: each device could have a delay of 0 or 1, as determined  
 183 independently and uniformly random. We resized the images into  $224 \times 224$  pixels and employed  
 184 convolutional neural networks with 6 convolutional layers and 1 fully connected layer.

185 Fig. 10 shows the results. It is clear that only Sageflow can combat both types of attacks effectively  
 186 under the existence of stragglers as well.

## 187 I Experiments in a more severe straggler scenario

188 When modeling stragglers, we gave a delay of 0, 1, 2 to each device in the experiments of the main  
 189 manuscript. In this section, each device can have delay of 0 to 8, again determined independently  
 190 and uniformly random. In Fig. 11, we show the results with both stragglers and adversaries under

<sup>1</sup><https://www.kaggle.com/pranavraikokte/covid19-image-dataset>

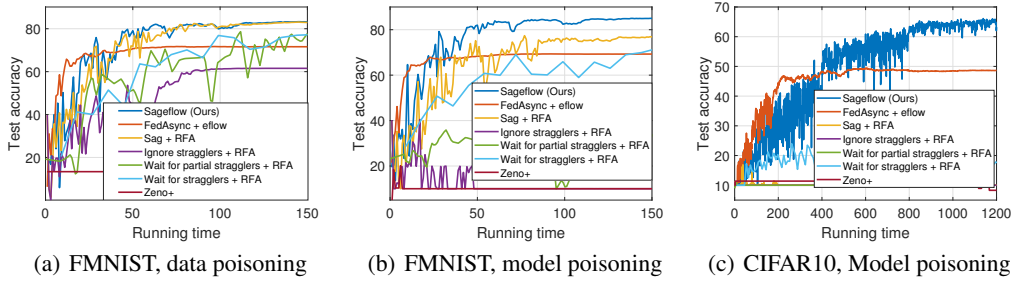

Figure 11: Performance in a more severe straggler scenario where each device can have delay of 0 to 8. We set  $C = 0.4$ ,  $r = 0.2$ . Sageflow still performs better than other schemes in a severe straggler scenario.

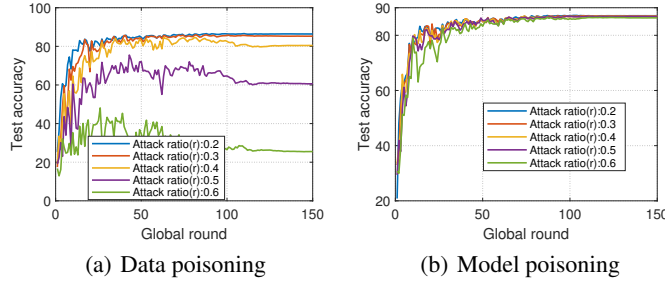

Figure 12: Performance with varying portions of adversaries. Data and model poisoning attacks are considered with FMNIST. We set  $C = 0.2$ .

191 data and model poisoning. We set  $C$  to 0.4 and  $r$  to 0.2. It can be seen that our Sageflow still shows  
 192 the best performance under both data poisoning and model poisoning compared to other baseline  
 193 schemes.

## 194 J Experiments with varying portion of adversaries

195 In this section, we show the performance of Sageflow with varying portions of adversaries under data  
 196 and model poisoning attacks with scale 10. We do not consider stragglers here. We set  $\delta$  to 1 and  $E_{th}$   
 197 to 1 as in the experiments of the main manuscript. Fig. 12 shows the results with different attack  
 198 ratios on FMNIST. For data poisoning, our Sageflow shows robustness against attack ratios up to  
 199 0.4, but with 0.5 or higher, performance is degraded. For model poisoning, it can be seen that our  
 200 Sageflow performs well even with higher attack ratios.

## 201 K Additional comparison with waiting for partial stragglers

202 In Fig. 13, we provide new experimental results by considering a scheme that waits for 30%, 50%,  
 203 70% of the selected devices. Here, when the waiting percentage is small so that the time required for  
 204 one global round is less than our time threshold, we are ignoring more stragglers (which means that  
 205 the attack ratio becomes higher under the existence of adversaries) so the performance is visibly poor  
 206 when combined with RFA. As the waiting percentage becomes larger, the method naturally reduces  
 207 to the wait for stragglers scheme. Overall, new results again confirm significant advantages of our  
 208 method.

## 209 L Proof of Theorem 1

### 210 L.1 Additional Notations for Proof

211 Let  $\mathbf{w}_t^j(k)$  be the model of the  $k$ -th benign device after  $j$  local updates starting from global round  $t$ .  
 212 At global round  $t$ , each device receives the current global model  $\mathbf{w}_t$  and round index (time stamp)  $t$

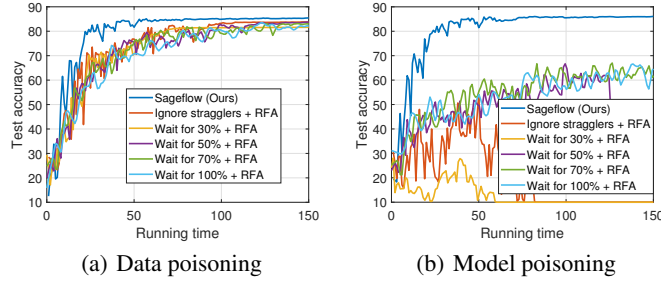

Figure 13: Comparison with the scheme that waits for a portion of devices. FMNIST is utilized with  $C = 0.2$  and  $r = 0.2$ .

213 from the server, and sets its initial model to  $\mathbf{w}_t$ , i.e.,  $\mathbf{w}_t^0(k) \leftarrow \mathbf{w}_t$  for all  $k = 1, \dots, N$ . Then each  
 214  $k$ -th benign device performs  $E$  local updates of stochastic gradient descent (SGD) with learning rate  
 215  $\eta$ :

$$\mathbf{w}_t^j(k) \leftarrow \mathbf{w}_t^{j-1}(k) - \eta \nabla F_k(\mathbf{w}_t^{j-1}(k), \xi_t^{j-1}(k)) \text{ for } j = 1, \dots, E, \quad (1)$$

216 where  $\xi_t^j(k)$  is a set of data samples that are randomly selected from the  $k$ -th device during the  $j$ -th  
 217 local update at global round  $t$ . After  $E$  local updates, the  $k$ -th benign device transmits  $\mathbf{w}_t^E(k)$  to the  
 218 server. However, in each round, the adversarial devices transmit poisoned model parameters.  
 219

220 Using these notations, the parameters defined in Section 2 can be rewritten as follows:

$$\mathbf{v}_{t+1}^{(i)} = \sum_{k \in U_t^{(i)}(E_{th})} \beta_i^{(k)}(\delta) \mathbf{w}_i^E(k) \text{ where } \beta_i^{(k)}(\delta) \propto \frac{m_k}{\{F_{pub}(\mathbf{w}_i^E(k))\}^\delta} \text{ and } \sum_{k \in U_t^{(i)}(E_{th})} \beta_i^{(k)}(\delta) = 1 \quad (2)$$

$$\mathbf{z}_{t+1} = \sum_{i=0}^t \alpha_t^{(i)}(\lambda) \mathbf{v}_{t+1}^{(i)} \text{ where } \alpha_t^{(i)}(\lambda) \propto \frac{\sum_{k \in U_t^{(i)}} m_k}{(t-i+1)^\lambda} \text{ and } \sum_{i=0}^t \alpha_t^{(i)}(\lambda) = 1 \quad (3)$$

$$\mathbf{w}_{t+1} = (1 - \gamma) \mathbf{w}_t + \gamma \mathbf{z}_{t+1} \quad (4)$$

223 We also define

$$\Gamma_t^{(i)} = \sum_{B_t^{(i)}(E_{th})} \beta_i^{(k)}(\delta) \quad (5)$$

224 where  $0 \leq \Gamma_t^{(i)} \leq 1$ .

## 225 L.2 Key Lemma and Proof

226 We introduce the following key lemma for proving Theorem 1. A part of our proof is based on the  
 227 convergence proof of FedAsync in [7].

228 **Lemma 1** Suppose Assumptions 1, 2 hold and the learning rate  $\eta$  is set to be less than  $\frac{1}{L}$ . Consider  
 229 the  $k$ -th benign device that received the current global model  $\mathbf{w}_t$  from the server at global round  $t$ .  
 230 After  $E$  local updates, the following holds:

$$\mathbb{E}[F(\mathbf{w}_t^E(k)) - F(\mathbf{w}^*) | \mathbf{w}_t^0(k)] \leq (1 - \eta\mu)^E [F(\mathbf{w}_t) - F(\mathbf{w}^*)] + \frac{E\rho_1\eta}{2}. \quad (6)$$

231 *Proof of Lemma 1.* First, consider one step of SGD in the  $k$ -th local device. For a given  $\mathbf{w}_t^j(k)$ , for  
 232 all global round  $t$  and for all local updates  $j \in \{0, 1, \dots, E-1\}$ , we have

$$\begin{aligned}
& \mathbb{E}[F(\mathbf{w}_t^{j+1}(k)) - F(\mathbf{w}^*) | \mathbf{w}_t^j(k)] \\
& \leq F(\mathbf{w}_t^j(k)) - F(\mathbf{w}^*) - \eta \mathbb{E}[\nabla F(\mathbf{w}_t^j(k))^T \nabla F_k(\mathbf{w}_t^j(k), \xi_t^j(k)) | \mathbf{w}_t^j(k)] \\
& \quad + \frac{L\eta^2}{2} \mathbb{E}[\|\nabla F_k(\mathbf{w}_t^j(k), \xi_t^j(k))\|^2 | \mathbf{w}_t^j(k)] \quad \blacktriangleright \text{SGD update and } L\text{-smoothness} \\
& \leq F(\mathbf{w}_t^j(k)) - F(\mathbf{w}^*) + \frac{\eta}{2} \mathbb{E}[\|\nabla F(\mathbf{w}_t^j(k)) - \nabla F_k(\mathbf{w}_t^j(k), \xi_t^j(k))\|^2 | \mathbf{w}_t^j(k)] \\
& \quad - \frac{\eta}{2} \|\nabla F(\mathbf{w}_t^j(k))\|^2 \quad \blacktriangleright \eta < \frac{1}{L} \\
& \leq F(\mathbf{w}_t^j(k)) - F(\mathbf{w}^*) - \frac{\eta}{2} \|\nabla F(\mathbf{w}_t^j(k))\|^2 + \frac{\eta\rho_1}{2} \quad \blacktriangleright \text{Assumption 2} \\
& \leq (1 - \eta\mu)[F(\mathbf{w}_t^j(k)) - F(\mathbf{w}^*)] + \frac{\eta\rho_1}{2} \quad \blacktriangleright \mu\text{-strongly convexity} \quad (7)
\end{aligned}$$

233 Applying above result to  $E$  local updates in  $k$ -th local device, we have

$$\begin{aligned}
& \mathbb{E}[F(\mathbf{w}_t^E(k)) - F(\mathbf{w}^*) | \mathbf{w}_t^0(k)] \\
& = \mathbb{E}[\mathbb{E}[F(\mathbf{w}_t^E(k)) - F(\mathbf{w}^*) | \mathbf{w}_t^{E-1}(k)] | \mathbf{w}_t^0(k)] \quad \blacktriangleright \text{Law of total expectation} \\
& \leq (1 - \eta\mu) \mathbb{E}[F(\mathbf{w}_t^{E-1}(k)) - F(\mathbf{w}^*) | \mathbf{w}_t^0(k)] + \frac{\eta\rho_1}{2} \quad \blacktriangleright \text{Inequality (7)} \\
& \quad \vdots \\
& \leq (1 - \eta\mu)^E [F(\mathbf{w}_t^0(k)) - F(\mathbf{w}^*)] + \frac{\eta\rho_1}{2} \sum_{j=1}^E (1 - \eta\mu)^{j-1} \\
& = (1 - \eta\mu)^E [F(\mathbf{w}_t^0(k)) - F(\mathbf{w}^*)] + \frac{\eta\rho_1}{2} \frac{1 - (1 - \eta\mu)^E}{\eta\mu} \quad \blacktriangleright \text{From } \eta < \frac{1}{L} \leq \frac{1}{\mu}, \eta\mu < 1 \\
& \leq (1 - \eta\mu)^E [F(\mathbf{w}_t) - F(\mathbf{w}^*)] + \frac{E\eta\rho_1}{2} \quad \blacktriangleright \text{From } \eta\mu < 1, 1 - (1 - \eta\mu)^E \leq E\eta\mu
\end{aligned}$$

### 234 L.3 Proof of Theorem 1

235 Now utilizing Lemma 1, we provide the proof for Theorem 1. First, consider one round of global  
236 aggregation at the server. For a given  $\mathbf{w}_{t-1}$ , the server updates the global model according to equation

237 (4). Then for all  $t \in 1, \dots, T$ , we have

$$\begin{aligned}
& \mathbb{E}[F(\mathbf{w}_t) - F(\mathbf{w}^*) | \mathbf{w}_{t-1}] \\
& \stackrel{(a)}{\leq} (1 - \gamma)[F(\mathbf{w}_{t-1}) - F(\mathbf{w}^*)] + \gamma \mathbb{E}[F(\mathbf{z}_t) - F(\mathbf{w}^*) | \mathbf{w}_{t-1}] \\
& \stackrel{(b)}{\leq} (1 - \gamma)[F(\mathbf{w}_{t-1}) - F(\mathbf{w}^*)] + \gamma \sum_{i=0}^{t-1} \alpha_{t-1}^{(i)}(\lambda) \mathbb{E}[F(\mathbf{v}_t^{(i)}) - F(\mathbf{w}^*) | \mathbf{w}_{t-1}] \\
& \stackrel{(c)}{\leq} (1 - \gamma)[F(\mathbf{w}_{t-1}) - F(\mathbf{w}^*)] + \gamma \sum_{i=0}^{t-1} \alpha_{t-1}^{(i)}(\lambda) \sum_{k \in U_{t-1}^{(i)}(E_{th})} \beta_i^{(k)}(\delta) \mathbb{E}[F(\mathbf{w}_i^E(k)) - F(\mathbf{w}^*) | \mathbf{w}_{t-1}] \\
& = (1 - \gamma)[F(\mathbf{w}_{t-1}) - F(\mathbf{w}^*)] + \gamma \sum_{i=0}^{t-1} \alpha_{t-1}^{(i)}(\lambda) \left\{ \sum_{k \in B_{t-1}^{(i)}(E_{th})} \beta_i^{(k)}(\delta) \mathbb{E}[F(\mathbf{w}_i^E(k)) - F(\mathbf{w}^*) | \mathbf{w}_{t-1}] \right. \\
& \quad \left. + \sum_{k \in M_{t-1}^{(i)}(E_{th})} \beta_i^{(k)}(\delta) \mathbb{E}[F(\mathbf{w}_i^E(k)) - F(\mathbf{w}^*) | \mathbf{w}_{t-1}] \right\} \\
& \stackrel{(d)}{\leq} (1 - \gamma)[F(\mathbf{w}_{t-1}) - F(\mathbf{w}^*)] + \frac{E\eta\rho_1\gamma}{2} + \gamma\Omega_{max}(E_{th}, \delta) \\
& \quad + \gamma(1 - \eta\mu)^E \sum_{i=0}^{t-1} \alpha_{t-1}^{(i)}(\lambda) \sum_{k \in B_{t-1}^{(i)}(E_{th})} \beta_i^{(k)}(\delta) \left[ \frac{F(\mathbf{w}_i) - F(\mathbf{w}^*)}{F(\mathbf{w}_i) - F(\mathbf{w}_{t-1}) + F(\mathbf{w}_{t-1}) - F(\mathbf{w}^*)} \right] \\
& = (1 - \gamma + \gamma \sum_{i=0}^{t-1} \alpha_{t-1}^{(i)}(\lambda) \Gamma_{t-1}^{(i)} (1 - \eta\mu)^E) [F(\mathbf{w}_{t-1}) - F(\mathbf{w}^*)] + \frac{E\eta\rho_1\gamma}{2} + \gamma\Omega_{max}(E_{th}, \delta) \\
& \quad + \gamma(1 - \eta\mu)^E \sum_{i=0}^{t-2} \alpha_{t-1}^{(i)}(\lambda) \sum_{k \in B_{t-1}^{(i)}(E_{th})} \beta_i^{(k)}(\delta) [F(\mathbf{w}_i) - F(\mathbf{w}_{t-1})] \\
& \stackrel{(e)}{\leq} (1 - \gamma + \gamma(1 - \eta\mu)^E) [F(\mathbf{w}_{t-1}) - F(\mathbf{w}^*)] + \frac{E\eta\rho_1\gamma}{2} + \gamma\Omega_{max}(E_{th}, \delta) + \gamma G_{t-1}(\lambda) \quad (8)
\end{aligned}$$

238 where  $e_t^{(i)} := F(\mathbf{w}_i) - F(\mathbf{w}_t)$  and  $G_t(\lambda) := \sum_{i=0}^{t-1} \alpha_t^{(i)}(\lambda) e_t^{(i)}$  and  $G_0(\lambda) = 0$ . (a), (b), (c) come  
239 from convexity, (d) follows Lemma 1 and the definition  $\Omega_{max} = \max_{0 \leq i \leq t, 0 \leq t \leq T} \Omega_t^{(i)}$ . (e) comes from  
240 the fact that  $\eta\mu < 1$  and  $0 \leq \alpha_t^{(i)}(\lambda) \leq 1$  and  $0 \leq \Gamma_t^{(i)} \leq 1$  for all  $i, t$  and  $\sum_{i=0}^t \alpha_t^{(i)}(\lambda) = 1$  for all  $t$ .  
241

242 Applying the above result to  $T$  global aggregations in the server, we have

$$\begin{aligned}
& \mathbb{E}[F(\mathbf{w}_T) - F(\mathbf{w}^*) | \mathbf{w}_0] \\
& \stackrel{(a)}{=} \mathbb{E}[\mathbb{E}[F(\mathbf{w}_T) - F(\mathbf{w}^*) | \mathbf{w}_{T-1}] | \mathbf{w}_0] \\
& \stackrel{(b)}{\leq} \mathbb{E}[(1 - \gamma + \gamma(1 - \eta\mu)^E)[F(\mathbf{w}_{T-1}) - F(\mathbf{w}^*)] | \mathbf{w}_0] + \frac{\gamma(E\eta\rho_1 + 2G_{T-1}(\lambda) + 2\Omega_{max}(E_{th}, \delta))}{2} \\
& \stackrel{(c)}{\leq} (1 - \gamma + \gamma(1 - \eta\mu)^E)^T [F(\mathbf{w}_0) - F(\mathbf{w}^*)] + \frac{\gamma(E\eta\rho_1 + 2G_{T-1}(\lambda) + 2\Omega_{max}(E_{th}, \delta))}{2} \\
& + \sum_{\tau=1}^{T-1} \frac{\gamma(E\eta\rho_1 + 2G_{T-1-\tau}(\lambda) + 2\Omega_{max}(E_{th}, \delta))}{2} (1 - \gamma + \gamma(1 - \eta\mu)^E)^\tau \\
& \stackrel{(d)}{\leq} (1 - \gamma + \gamma(1 - \eta\mu)^E)^T [F(\mathbf{w}_0) - F(\mathbf{w}^*)] \\
& + [1 - \{1 - \gamma + \gamma(1 - \eta\mu)^E\}^T] \frac{E\eta\rho_1 + 2G_{max}(\lambda) + 2\Omega_{max}(E_{th}, \delta)}{2(1 - (1 - \eta\mu)^E)} \\
& \stackrel{(e)}{\leq} (1 - \gamma + \gamma(1 - \eta\mu)^E)^T [F(\mathbf{w}_0) - F(\mathbf{w}^*)] \\
& + [1 - \{1 - \gamma + \gamma(1 - \eta\mu)^E\}^T] \frac{\rho_1 + 2\mu G_{max}(\lambda) + 2\mu\Omega_{max}(E_{th}, \delta)}{2\eta\mu^2} \\
& = \nu^T [F(\mathbf{w}_0) - F(\mathbf{w}^*)] + (1 - \nu^T) Z(\lambda, E_{th}, \delta)
\end{aligned}$$

243 which completes the proof. Here, (a) comes from the *Law of total expectation*, (b), (c) are due  
244 to inequality (8). (d) is obtained from the definition of  $G_{max}(\lambda) := \max_{1 \leq t \leq T} \sum_{i=0}^{t-1} \alpha_t^{(i)}(\lambda) e_t^{(i)}$ . In  
245 addition, (e) is from  $\eta\mu \leq 1$ .

## 246 M Additional discussions on the impact of staleness exponent $\lambda$

247 From Theorem 1, we confirmed that the error term  $G_{max}(\lambda)$  caused by stragglers can be reduced by  
248 increasing the staleness exponent  $\lambda$ . But we also note that choosing a very large  $\lambda$  makes our Sagflow  
249 to consider only the group with the smallest staleness in each global aggregation; Sagflow reduces to  
250 the *ignore stragglers* scheme, which can lose significant data at each round and often converges to a  
251 suboptimal point in practice. Fig. 14 below shows the result with varying  $\lambda$  using FMNIST dataset.  
252 Each device can have delay of 0, 1, 2 which is determined independently and uniformly random. The  
253 results indicate that an appropriate  $\lambda$  has to be chosen to provide more weights to the recent groups  
254 with small staleness, while not totally ignoring the results with large staleness.

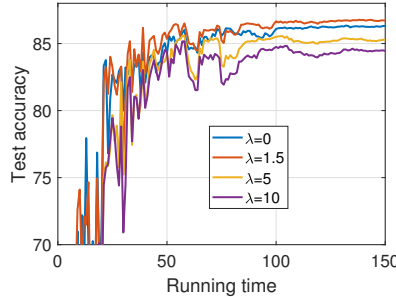

Figure 14: Performance of Sageflow with different  $\lambda$  values considering only stragglers. An appropriate  $\lambda$  has to be chosen to provide more weights to the recent groups with small staleness, while not totally ignoring the results with large staleness.

255 **Comparison with FedAsync [7]:** To compare our Sagflow with FedAsync, we consider a setup with  
256 only stragglers. Let  $n_t = \sum_{i=0}^t |U_t^{(i)}|$  be the number of models received at global round  $t$ . Note  
257 that our scheme performs staleness-aware grouping with those  $n_t$  models to update the global model

258 once, while FedAsync updates the global model  $n_t$  times one-by-one. Hence, after  $T$  global rounds,  
 259 FedAsync performs  $c(T) = \sum_{t=1}^T n_t$  updates at the server. If we apply the same proof technique  
 260 of ours, we have  $\mathbb{E}[F(\mathbf{w}_{c(T)}) - F(\mathbf{w}^*)] \leq \nu^{c(T)} [F(\mathbf{w}_0) - F(\mathbf{w}^*)] + (1 - \nu^{c(T)})Z$  for FedAsync  
 261 where  $\nu = 1 - \gamma + \gamma(1 - \eta\mu)^E$ ,

$$Z = \frac{\rho_1 + 2\mu G_{max}}{2\eta\mu^2}, \quad (9)$$

262

$$\begin{aligned} G_{max} &= \max_{0 \leq c \leq c(T), 0 \leq i \leq c-1} [F(\mathbf{w}_i) - F(\mathbf{w}_c)] \\ &= \max_{0 \leq c \leq c(T), 0 \leq i \leq c-1} e_c^{(i)}. \end{aligned} \quad (10)$$

263 Note that FedAsync controls  $\gamma$  based on the staleness, which controls  $\nu$ . However, the staleness  
 264 exponent of FedAsync does not control the  $G_{max}$  term of (10) directly. Compared to FedAsync,  
 265 our  $G_{max}$  term (9) can be directly controlled by staleness exponent  $\lambda$ , which affects  $\alpha_t^{(i)}(\lambda)$ ; by  
 266 choosing an appropriate  $\lambda$ , we can reduce the errors caused by stragglers with larger staleness in  
 267  $G_{max}$ . Regarding the global updates, it can be seen that more global updates are performed in  
 268 FedAsync than Sageflow under the same conditions. However, in order to reduce the error term  
 269  $G_{max}$  in FedAsync,  $\gamma$  should be reduced which makes convergence speed slower. Compared to  
 270 FedAsync, our staleness-aware grouping can keep  $\gamma$  high while reducing  $G_{max}$ , by controlling the  
 271 staleness exponent  $\lambda$ .

## 272 N Additional discussions on the impact of $E_{th}$ and $\delta$

273 As we stated in the main manuscript, we can filter out the adversaries with high entropies by choosing  
 274 an appropriate  $E_{th}$ . Here, we note that selecting a small  $E_{th}$  can degrade the performance of Sageflow  
 275 (as in Fig. 4) since not only the adversaries but also the benign devices are filtered out with a large  
 276  $E_{th}$ . As can be seen from Fig. 4,  $E_{th}$  is a hyperparameter that can be easily tuned since there is a  
 277 huge gap between the entropy values of benign versus adversarial devices.

278 Regarding  $\delta$ , it can be easily seen that the error term caused by adversaries goes to 0 as  $\delta$  increases:  
 279 for an adversary device  $k \in M_t^{(i)}(E_{th})$ , we can write

$$\begin{aligned} \beta_i^{(k)}(\delta)[F(\mathbf{w}_t(k)) - F(\mathbf{w}^*)] &\leq \frac{\frac{m_k}{F_{pub}(\mathbf{w}_t(k))^\delta}}{\sum_{j \in U_t^{(i)}(E_{th})} \frac{m_j}{F_{pub}(\mathbf{w}_t(j))^\delta}} F(\mathbf{w}_t(k)) \\ &\leq \frac{\frac{m_k}{F_{pub}(\mathbf{w}_t(k))^\delta}}{\frac{m_{j_B}}{F_{pub}(\mathbf{w}_t(j_B))^\delta}} F(\mathbf{w}_t(k)) \\ &= \frac{m_k}{m_{j_B}} \frac{F_{pub}(\mathbf{w}_t(j_B))^\delta}{F_{pub}(\mathbf{w}_t(k))^\delta} F(\mathbf{w}_t(k)) \end{aligned} \quad (11)$$

280 where  $j_B$  is an arbitrary benign device chosen from  $U_t^{(i)}(E_{th})$ . Here, since  $\mathbf{w}_t(j_B)$  is the model  
 281 of a benign device, we can write  $F_{pub}(\mathbf{w}_t(k)) \gg F_{pub}(\mathbf{w}_t(j_B))$  for an adversarial device  $k$  un-  
 282 der data poisoning or scaled backdoor attacks. Therefore, we can conclude that  $\Omega_t^{(i)}(E_{th}, \delta) =$   
 283  $\sum_{k \in M_t^{(i)}(E_{th})} \beta_i^{(k)}(\delta)[F(\mathbf{w}_t(k)) - F(\mathbf{w}^*)]$  goes to 0 as  $\delta$  increases. However, the effect of adver-  
 284 saries can be sufficiently reduced even with a fixed  $\delta = 1$ , as can be seen in the experiments in the  
 285 main manuscript and Supplementary Material. We also note that selecting a very large  $\delta$  degrades the  
 286 performance of Sageflow as observed in Fig. 4. This is because only the device having the smallest  
 287 loss is considered with a very large  $\delta$ , ignoring the effects of other benign devices. As shown in  
 288 the results in Fig 4,  $\delta$  is a hyperparameter that can be easily tuned since the models of adversaries have  
 289 relatively large losses under data poisoning or scaled backdoor attacks.

290 To sum up, we have to choose an appropriate  $E_{th}$  and  $\delta$  to achieve a desired level of performance,  
 291 which is easy; the performance of Sageflow is not highly sensitive to those hyperparameters as long  
 292 as they are chosen in a reasonable range as shown in Fig 4.

293 **References**

- 294 [1] Eugene Bagdasaryan, Andreas Veit, Yiqing Hua, Deborah Estrin, and Vitaly Shmatikov. How to  
295 backdoor federated learning. *arXiv preprint arXiv:1807.00459*, 2018.
- 296 [2] Peva Blanchard, Rachid Guerraoui, Julien Stainer, et al. Machine learning with adversaries:  
297 Byzantine tolerant gradient descent. In *Advances in Neural Information Processing Systems*,  
298 pages 119–129, 2017.
- 299 [3] Sebastian Caldas, Sai Meher Karthik Duddu, Peter Wu, Tian Li, Jakub Konečný, H Brendan  
300 McMahan, Virginia Smith, and Ameet Talwalkar. Leaf: A benchmark for federated settings.  
301 *arXiv preprint arXiv:1812.01097*, 2018.
- 302 [4] Xiaoyu Cao, Minghong Fang, Jia Liu, and Neil Zhenqiang Gong. Fltrust: Byzantine-robust  
303 federated learning via trust bootstrapping. *arXiv preprint arXiv:2012.13995*, 2020.
- 304 [5] Krishna Pillutla, Sham M Kakade, and Zaid Harchaoui. Robust aggregation for federated learning.  
305 *arXiv preprint arXiv:1912.13445*, 2019.
- 306 [6] Saurav Prakash and Amir Salman Avestimehr. Mitigating byzantine attacks in federated learning.  
307 *arXiv preprint arXiv:2010.07541*, 2020.
- 308 [7] Cong Xie, Sanmi Koyejo, and Indranil Gupta. Asynchronous federated optimization. *arXiv*  
309 *preprint arXiv:1903.03934*, 2019.
